# Supplementary material
Source: PubMed Central journal article supplement (PMC5885831)

## Supplementary Online Content

Ellis L, Canchola AJ, Spiegel D, Ladabaum U, Haile RW, Gomez SL.. Trends in cancer survival by health insurance status in California from 1997 to 2014. *JAMA Oncol*. Published November 30, 2017. doi:10.1001/jamaoncol.2017.3846

**eTable 1.** Number of cases and distribution (%) of key demographic and clinical characteristics of 1,149,891 patients diagnosed with breast, prostate, lung, or colorectal cancer or melanoma between 1997 and 2014 in California, by insurance status and sex.

**eTable 2.** Distribution (%) of stage at diagnosis by insurance status, for each cancer site, sex and calendar period of diagnosis: California, 1997-2014.

**eTable 3.** Five-year cancer-specific survival at age 65 by insurance status and calendar period, for each cancer site and sex: California, 1997-2014.

**eTable 4.** Five-year cancer-specific mortality by health insurance status (reference: Private only) in each calendar period of diagnosis, by cancer site and sex: California, 1997-2014 (full table).

**eTable 5.** Five-year all-cause mortality by health insurance status (reference: Private only) in each calendar period of diagnosis, by cancer site and sex: California, 1997-2014.

**eFigure.** Five-year cancer-specific survival at age 65 by insurance status and calendar period, for A) lung cancer (men), B) colorectal cancer (men), C) melanoma (men) and D) melanoma (women).

This supplementary material has been provided by the authors to give readers additional information about their work.

**eTable 1.** Number of cases and distribution (%) of key demographic and clinical characteristics of 1,149, 891 patients diagnosed with breast, prostate, lung, or colorectal cancer or melanoma between 1997 and 2014 in California, by insurance status<sup>a</sup> and sex.

|                                          |            | Men  |         |          |                           | Women |         |          |                           |
|------------------------------------------|------------|------|---------|----------|---------------------------|-------|---------|----------|---------------------------|
|                                          |            | None | Private | Medicare | Other public <sup>b</sup> | None  | Private | Medicare | Other public <sup>b</sup> |
| <b>Calendar period (number of cases)</b> |            |      |         |          |                           |       |         |          |                           |
|                                          | 1997-2002  | 3556 | 97189   | 71390    | 21867                     | 2794  | 102725  | 57276    | 17572                     |
|                                          | 2003-2008  | 3723 | 100861  | 64149    | 34084                     | 2603  | 103401  | 49411    | 31895                     |
|                                          | 2009-2014  | 3094 | 91836   | 60626    | 34155                     | 2455  | 102642  | 53381    | 37206                     |
| <b>Cancer site</b>                       |            |      |         |          |                           |       |         |          |                           |
|                                          | Breast     |      |         |          |                           | 47.2  | 63.6    | 47.9     | 56.7                      |
|                                          | Prostate   | 38.5 | 56.7    | 56.3     | 45.1                      |       |         |          |                           |
|                                          | Lung       | 28.0 | 15.2    | 21.3     | 19.7                      | 21.9  | 13.7    | 26.2     | 21.4                      |
|                                          | Colorectal | 23.1 | 17.5    | 16.3     | 20.9                      | 21.6  | 14.5    | 21.5     | 19.1                      |
|                                          | Melanoma   | 10.4 | 10.6    | 6.2      | 4.5                       | 9.3   | 8.1     | 4.4      | 2.8                       |
| <b>Age at diagnosis</b>                  |            |      |         |          |                           |       |         |          |                           |
|                                          | 18-49      | 16.4 | 10.1    | 0.0      | 7.0                       | 30.9  | 27.6    | 0.0      | 22.5                      |
|                                          | 50-59      | 36.2 | 30.2    | 2.7      | 19.9                      | 34.5  | 30.1    | 3.5      | 23.5                      |
|                                          | 60-69      | 33.3 | 34.6    | 31.3     | 34.1                      | 24.6  | 22.2    | 24.7     | 23.1                      |
|                                          | 70-79      | 10.4 | 18.0    | 44.6     | 27.3                      | 6.4   | 12.6    | 41.0     | 17.9                      |
|                                          | 80+        | 3.8  | 7.1     | 20.4     | 11.8                      | 3.6   | 7.6     | 30.7     | 12.9                      |
| <b>Stage</b>                             |            |      |         |          |                           |       |         |          |                           |
|                                          | Localized  | 42.9 | 64.4    | 59.5     | 47.0                      | 38.2  | 55.6    | 48.8     | 40.3                      |
|                                          | Regional   | 18.7 | 18.0    | 16.8     | 19.4                      | 28.5  | 29.6    | 26.7     | 33.4                      |
|                                          | Distant    | 33.4 | 15.0    | 19.0     | 28.6                      | 28.8  | 13.2    | 20.7     | 22.5                      |
|                                          | Unknown    | 4.9  | 2.5     | 4.8      | 5.0                       | 4.5   | 1.6     | 3.8      | 3.8                       |
| <b>Race/ethnicity</b>                    |            |      |         |          |                           |       |         |          |                           |
|                                          | NH White   | 50.4 | 69.4    | 73.7     | 48.3                      | 47.8  | 68.9    | 78.8     | 43.0                      |

|                          |               |      |      |      |      |      |      |      |      |
|--------------------------|---------------|------|------|------|------|------|------|------|------|
|                          | NH Black      | 12.7 | 7.8  | 6.0  | 13.4 | 8.9  | 5.8  | 5.3  | 10.4 |
|                          | Hispanic      | 24.5 | 12.6 | 10.9 | 21.3 | 26.8 | 13.2 | 8.7  | 28.6 |
|                          | Chinese       | 2.6  | 2.3  | 1.9  | 4.3  | 3.5  | 3.0  | 1.6  | 4.2  |
|                          | Japanese      | 0.7  | 1.0  | 1.2  | 0.3  | 1.0  | 1.3  | 1.4  | 0.7  |
|                          | Filipino      | 2.7  | 2.2  | 1.7  | 4.5  | 4.2  | 3.3  | 1.5  | 4.9  |
|                          | Other Asian   | 4.6  | 2.1  | 2.0  | 6.0  | 6.9  | 3.3  | 1.7  | 7.1  |
|                          | Other/Unknown | 1.8  | 2.6  | 2.5  | 1.8  | 1.7  | 1.2  | 0.9  | 1.1  |
| <b>Neighborhood SES</b>  |               |      |      |      |      |      |      |      |      |
|                          | Q1 (Low SES)  | 23.6 | 9.5  | 12.6 | 26.7 | 21.5 | 9.0  | 11.9 | 28.0 |
|                          | Q2            | 21.5 | 15.8 | 18.0 | 24.7 | 21.4 | 15.6 | 18.2 | 25.9 |
|                          | Q3            | 19.0 | 20.6 | 21.1 | 21.0 | 20.5 | 20.9 | 22.0 | 20.4 |
|                          | Q4            | 18.0 | 24.8 | 22.2 | 16.3 | 18.6 | 25.3 | 22.9 | 25.8 |
|                          | Q5 (High SES) | 17.9 | 29.3 | 26.2 | 11.3 | 18.1 | 29.3 | 25.0 | 9.0  |
| <b>Marital status</b>    |               |      |      |      |      |      |      |      |      |
|                          | Unmarried     | 48.5 | 21.6 | 25.7 | 45.5 | 52.1 | 36.7 | 55.4 | 61.1 |
|                          | Married       | 46.0 | 70.9 | 68.7 | 49.7 | 43.3 | 59.0 | 41.9 | 36.0 |
|                          | Unknown       | 5.5  | 7.5  | 5.6  | 4.8  | 4.6  | 4.3  | 2.7  | 3.0  |
| <b>Surgery</b>           |               |      |      |      |      |      |      |      |      |
|                          | No            | 56.3 | 44.3 | 56.4 | 59.2 | 34.8 | 15.1 | 27.9 | 28.0 |
|                          | Yes           | 43.6 | 55.7 | 43.4 | 40.7 | 65.1 | 84.9 | 72.1 | 71.9 |
|                          | Unknown       | 0.1  | 0.1  | 0.1  | 0.1  | 0.1  | 0.0  | 0.1  | 0.1  |
| <b>Radiation therapy</b> |               |      |      |      |      |      |      |      |      |
|                          | No            | 77.2 | 73.5 | 71.6 | 70.0 | 72.8 | 62.4 | 70.5 | 67.0 |
|                          | Yes           | 22.7 | 26.5 | 28.3 | 29.9 | 27.1 | 37.6 | 29.4 | 33.0 |
|                          | Unknown       | 0.1  | 0.0  | 0.1  | 0.1  | 0.1  | 0.0  | 0.1  | 0.1  |
| <b>Chemotherapy</b>      |               |      |      |      |      |      |      |      |      |
|                          | No            | 77.5 | 21.6 | 25.7 | 45.5 | 58.5 | 58.4 | 75.1 | 56.1 |
|                          | Yes           | 20.8 | 70.9 | 68.7 | 49.7 | 38.8 | 40.0 | 23.0 | 41.3 |
|                          | Unknown       | 1.7  | 7.5  | 5.6  | 4.8  | 2.7  | 1.6  | 2.0  | 2.5  |

<sup>a</sup> 5% of eligible cases were excluded from the analysis because of unknown insurance status. The proportion was similar in each calendar period. Excluded patients were older, more likely to live in low SES neighborhoods, and more likely to have missing information on race/ethnicity, marital status, stage at diagnosis, and treatment.

<sup>b</sup> 74% of patients in the 'Other public' insurance category had Medicaid insurance.

**eTable 2.** Distribution (%) of stage at diagnosis by insurance status, for each cancer site, sex and calendar period of diagnosis: California, 1997-2014

|                     | 1997-2002 |         |          |        | 2003-2008 |         |          |        | 2009-2014 |         |          |        |
|---------------------|-----------|---------|----------|--------|-----------|---------|----------|--------|-----------|---------|----------|--------|
|                     | None      | Private | Medicare | Public | None      | Private | Medicare | Public | None      | Private | Medicare | Public |
| <b>Breast</b>       |           |         |          |        |           |         |          |        |           |         |          |        |
| Localized           | 48.2      | 62.2    | 66.2     | 49.1   | 46.2      | 62.3    | 66.3     | 50.7   | 46.6      | 64.5    | 68.0     | 52.0   |
| Regional            | 36.1      | 33.4    | 27.0     | 39.7   | 34.9      | 33.4    | 26.9     | 39.1   | 34.6      | 30.9    | 25.0     | 37.2   |
| Distant             | 10.2      | 3.2     | 4.3      | 6.9    | 14.9      | 3.6     | 5.0      | 7.7    | 14.3      | 3.9     | 5.7      | 9.1    |
| Unknown             | 5.6       | 1.2     | 2.5      | 4.4    | 4.0       | 0.7     | 1.8      | 2.5    | 4.5       | 0.7     | 1.3      | 1.7    |
| <b>Prostate</b>     |           |         |          |        |           |         |          |        |           |         |          |        |
| Localized           | 70.4      | 85.1    | 82.4     | 74.6   | 70.2      | 80.3    | 79.8     | 76.2   | 68.2      | 78.5    | 74.5     | 71.5   |
| Regional            | 11.2      | 8.1     | 6.7      | 9.1    | 16.1      | 15.1    | 11.1     | 11.5   | 14.1      | 15.5    | 13.8     | 13.3   |
| Distant             | 10.5      | 3.7     | 5.1      | 8.4    | 10.5      | 3.2     | 5.2      | 8.0    | 13.0      | 3.9     | 7.6      | 10.5   |
| Unknown             | 7.9       | 3.1     | 5.7      | 7.8    | 3.3       | 1.5     | 3.9      | 4.3    | 4.7       | 2.0     | 4.1      | 4.7    |
| <b>Lung (men)</b>   |           |         |          |        |           |         |          |        |           |         |          |        |
| Localized           | 6.9       | 14.5    | 15.8     | 12.1   | 6.9       | 12.8    | 14.6     | 12.2   | 6.6       | 13.8    | 16.7     | 13.2   |
| Regional            | 14.6      | 21.5    | 20.4     | 18.8   | 12.2      | 20.9    | 21.1     | 19.3   | 15.9      | 21.2    | 21.5     | 20.5   |
| Distant             | 71.9      | 58.1    | 55.5     | 61.4   | 77.4      | 63.5    | 59.4     | 64.4   | 73.6      | 62.5    | 57.9     | 63.0   |
| Unknown             | 6.7       | 5.9     | 8.4      | 7.7    | 3.4       | 2.9     | 5.0      | 4.2    | 3.9       | 2.5     | 3.8      | 3.3    |
| <b>Lung (women)</b> |           |         |          |        |           |         |          |        |           |         |          |        |
| Localized           | 7.7       | 17.2    | 18.2     | 14.5   | 8.4       | 17.0    | 17.3     | 13.7   | 8.1       | 18.5    | 20.3     | 15.9   |
| Regional            | 14.2      | 20.8    | 20.6     | 19.5   | 13.3      | 21.0    | 22.3     | 19.2   | 15.7      | 21.4    | 21.5     | 18.7   |
| Distant             | 72.4      | 55.9    | 52.6     | 58.0   | 75.0      | 58.8    | 54.9     | 62.3   | 73.4      | 57.7    | 54.3     | 61.3   |
| Unknown             | 5.6       | 6.0     | 8.7      | 7.9    | 3.3       | 3.2     | 5.6      | 4.8    | 2.8       | 2.4     | 3.9      | 4.1    |
| <b>CRC (men)</b>    |           |         |          |        |           |         |          |        |           |         |          |        |
| Localized           | 26.9      | 39.9    | 38.6     | 31.5   | 28.4      | 42.8    | 41.4     | 34.4   | 29.4      | 42.9    | 41.4     | 32.2   |
| Regional            | 32.6      | 38.5    | 38.8     | 39.0   | 36.0      | 36.1    | 36.0     | 36.2   | 36.5      | 36.1    | 34.8     | 36.3   |
| Distant             | 33.5      | 18.8    | 17.9     | 23.8   | 31.4      | 18.7    | 19.1     | 25.2   | 30.5      | 18.9    | 19.8     | 26.9   |
| Unknown             | 7.0       | 2.8     | 4.6      | 5.6    | 4.2       | 2.4     | 3.4      | 4.2    | 3.6       | 2.0     | 4.0      | 4.5    |

|                         |      |      |      |      |      |      |      |      |      |      |      |      |
|-------------------------|------|------|------|------|------|------|------|------|------|------|------|------|
| <b>CRC (women)</b>      |      |      |      |      |      |      |      |      |      |      |      |      |
| Localized               | 29.3 | 37.2 | 37.3 | 31.2 | 30.1 | 40.7 | 39.4 | 33.0 | 31.6 | 42.6 | 39.8 | 33.4 |
| Regional                | 40.0 | 40.3 | 39.3 | 39.3 | 37.3 | 36.8 | 37.3 | 38.2 | 34.7 | 35.8 | 36.1 | 35.3 |
| Distant                 | 25.9 | 19.7 | 18.1 | 22.9 | 28.1 | 20.0 | 18.4 | 23.3 | 29.5 | 19.4 | 18.9 | 25.5 |
| Unknown                 | 4.8  | 2.8  | 5.3  | 6.7  | 4.5  | 2.5  | 4.9  | 5.6  | 4.2  | 2.2  | 5.1  | 5.9  |
| <b>Melanoma (men)</b>   |      |      |      |      |      |      |      |      |      |      |      |      |
| Localized               | 73.7 | 86.2 | 81.9 | 71.0 | 75.4 | 84.4 | 81.1 | 65.2 | 71.3 | 83.0 | 79.8 | 64.5 |
| Regional                | 11.6 | 7.1  | 7.2  | 13.2 | 10.2 | 9.7  | 10.0 | 17.7 | 15.8 | 9.9  | 10.8 | 17.9 |
| Distant                 | 8.3  | 3.4  | 5.6  | 8.8  | 10.9 | 3.9  | 5.6  | 11.7 | 9.6  | 4.2  | 6.0  | 13.9 |
| Unknown                 | 6.5  | 3.3  | 5.3  | 7.0  | 3.5  | 1.9  | 3.4  | 5.4  | 3.3  | 3.0  | 3.4  | 3.6  |
| <b>Melanoma (women)</b> |      |      |      |      |      |      |      |      |      |      |      |      |
| Localized               | 81.1 | 90.5 | 82.2 | 73.9 | 85.7 | 90.0 | 81.7 | 70.3 | 78.0 | 88.3 | 82.5 | 67.8 |
| Regional                | 5.2  | 5.3  | 7.4  | 12.0 | 8.3  | 6.3  | 11.1 | 16.6 | 7.9  | 6.6  | 10.2 | 17.6 |
| Distant                 | 5.6  | 1.7  | 4.9  | 6.7  | 3.0  | 2.2  | 4.4  | 8.3  | 10.7 | 2.2  | 4.4  | 9.1  |
| Unknown                 | 8.0  | 2.5  | 5.5  | 7.4  | 3.0  | 1.5  | 2.8  | 4.8  | 3.3  | 2.8  | 2.9  | 5.4  |

**eTable 3.** Five-year cancer-specific survival at age 65 by insurance status and calendar period, for each cancer site and sex: California, 1997-2014

|                          | 1997-2002   |         |      | 2003-2008   |         |      | 2009-2014   |         |      |
|--------------------------|-------------|---------|------|-------------|---------|------|-------------|---------|------|
| <b>Men</b>               | Survival    | 95% CIs |      | Survival    | 95% CIs |      | Survival    | 95% CIs |      |
| <b>Prostate cancer</b>   |             |         |      |             |         |      |             |         |      |
| No insurance             | <b>0.92</b> | 0.90    | 0.94 | <b>0.90</b> | 0.88    | 0.93 | <b>0.90</b> | 0.87    | 0.94 |
| Private only             | <b>0.96</b> | 0.96    | 0.96 | <b>0.97</b> | 0.96    | 0.97 | <b>0.97</b> | 0.96    | 0.97 |
| Medicare                 | <b>0.96</b> | 0.96    | 0.97 | <b>0.97</b> | 0.96    | 0.97 | <b>0.96</b> | 0.96    | 0.97 |
| Other public             | <b>0.94</b> | 0.93    | 0.94 | <b>0.95</b> | 0.94    | 0.95 | <b>0.94</b> | 0.93    | 0.95 |
| <b>Lung cancer</b>       |             |         |      |             |         |      |             |         |      |
| No insurance             | <b>0.08</b> | 0.06    | 0.10 | <b>0.09</b> | 0.06    | 0.12 | <b>0.09</b> | 0.07    | 0.11 |
| Private only             | <b>0.17</b> | 0.17    | 0.18 | <b>0.19</b> | 0.18    | 0.20 | <b>0.23</b> | 0.22    | 0.25 |
| Medicare                 | <b>0.18</b> | 0.17    | 0.19 | <b>0.20</b> | 0.19    | 0.22 | <b>0.24</b> | 0.22    | 0.26 |
| Other public             | <b>0.15</b> | 0.13    | 0.16 | <b>0.17</b> | 0.15    | 0.18 | <b>0.19</b> | 0.17    | 0.21 |
| <b>Colorectal cancer</b> |             |         |      |             |         |      |             |         |      |
| No insurance             | <b>0.49</b> | 0.44    | 0.54 | <b>0.53</b> | 0.48    | 0.59 | <b>0.52</b> | 0.48    | 0.58 |
| Private only             | <b>0.69</b> | 0.68    | 0.70 | <b>0.72</b> | 0.71    | 0.73 | <b>0.73</b> | 0.72    | 0.75 |
| Medicare                 | <b>0.67</b> | 0.66    | 0.68 | <b>0.69</b> | 0.68    | 0.70 | <b>0.69</b> | 0.67    | 0.70 |
| Other public             | <b>0.58</b> | 0.56    | 0.61 | <b>0.61</b> | 0.59    | 0.63 | <b>0.59</b> | 0.57    | 0.61 |
| <b>Melanoma</b>          |             |         |      |             |         |      |             |         |      |
| No insurance             | <b>0.75</b> | 0.68    | 0.83 | <b>0.80</b> | 0.70    | 0.90 | <b>0.78</b> | 0.69    | 0.88 |
| Private only             | <b>0.89</b> | 0.87    | 0.91 | <b>0.90</b> | 0.87    | 0.93 | <b>0.91</b> | 0.89    | 0.93 |
| Medicare                 | <b>0.85</b> | 0.81    | 0.89 | <b>0.87</b> | 0.82    | 0.92 | <b>0.87</b> | 0.83    | 0.92 |
| Other public             | <b>0.74</b> | 0.69    | 0.80 | <b>0.73</b> | 0.69    | 0.78 | <b>0.73</b> | 0.68    | 0.79 |
| <b>Women</b>             |             |         |      |             |         |      |             |         |      |
| <b>Breast cancer</b>     |             |         |      |             |         |      |             |         |      |
| No insurance             | <b>0.77</b> | 0.74    | 0.80 | <b>0.72</b> | 0.69    | 0.76 | <b>0.69</b> | 0.64    | 0.74 |
| Private only             | <b>0.90</b> | 0.90    | 0.91 | <b>0.91</b> | 0.91    | 0.92 | <b>0.92</b> | 0.91    | 0.92 |
| Medicare                 | <b>0.88</b> | 0.88    | 0.89 | <b>0.89</b> | 0.89    | 0.90 | <b>0.89</b> | 0.89    | 0.90 |
| Other public             | <b>0.81</b> | 0.80    | 0.82 | <b>0.82</b> | 0.81    | 0.83 | <b>0.81</b> | 0.80    | 0.82 |
| <b>Lung cancer</b>       |             |         |      |             |         |      |             |         |      |
| No insurance             | <b>0.10</b> | 0.08    | 0.13 | <b>0.13</b> | 0.10    | 0.16 | <b>0.10</b> | 0.08    | 0.14 |
| Private only             | <b>0.23</b> | 0.22    | 0.24 | <b>0.25</b> | 0.24    | 0.26 | <b>0.30</b> | 0.29    | 0.32 |

|                          |              |             |      |      |             |      |      |             |      |      |
|--------------------------|--------------|-------------|------|------|-------------|------|------|-------------|------|------|
|                          | Medicare     | <b>0.24</b> | 0.23 | 0.26 | <b>0.28</b> | 0.26 | 0.30 | <b>0.32</b> | 0.29 | 0.34 |
|                          | Other public | <b>0.20</b> | 0.19 | 0.22 | <b>0.21</b> | 0.20 | 0.23 | <b>0.25</b> | 0.23 | 0.27 |
| <b>Colorectal cancer</b> |              |             |      |      |             |      |      |             |      |      |
|                          | No insurance | <b>0.61</b> | 0.56 | 0.66 | <b>0.60</b> | 0.55 | 0.65 | <b>0.58</b> | 0.51 | 0.65 |
|                          | Private only | <b>0.69</b> | 0.68 | 0.70 | <b>0.71</b> | 0.70 | 0.72 | <b>0.74</b> | 0.73 | 0.75 |
|                          | Medicare     | <b>0.69</b> | 0.68 | 0.70 | <b>0.71</b> | 0.70 | 0.72 | <b>0.71</b> | 0.70 | 0.72 |
|                          | Other public | <b>0.63</b> | 0.61 | 0.65 | <b>0.64</b> | 0.63 | 0.66 | <b>0.64</b> | 0.62 | 0.65 |
| <b>Melanoma</b>          |              |             |      |      |             |      |      |             |      |      |
|                          | No insurance | <b>0.86</b> | 0.79 | 0.94 | <b>0.87</b> | 0.81 | 0.94 | <b>0.81</b> | 0.68 | 0.96 |
|                          | Private only | <b>0.93</b> | 0.91 | 0.94 | <b>0.93</b> | 0.91 | 0.96 | <b>0.94</b> | 0.93 | 0.96 |
|                          | Medicare     | <b>0.90</b> | 0.87 | 0.93 | <b>0.91</b> | 0.87 | 0.95 | <b>0.91</b> | 0.87 | 0.95 |
|                          | Other public | <b>0.76</b> | 0.71 | 0.81 | <b>0.77</b> | 0.73 | 0.82 | <b>0.78</b> | 0.73 | 0.84 |



**eTable 4.** Five-year cancer-specific mortality by health insurance status (reference: Private only) in each calendar period of diagnosis, by cancer site and sex: California, 1997-2014

|                                      |              | 1997 – 2002           |             |                  | 2003 - 2008           |             |                  |   | 2009-2014             |             |                  |
|--------------------------------------|--------------|-----------------------|-------------|------------------|-----------------------|-------------|------------------|---|-----------------------|-------------|------------------|
| Men                                  |              | Cause-specific deaths | HR          | 95% CI           | Cause-specific deaths | HR          | 95% CI           |   | Cause-specific deaths | HR          | 95% CI           |
| <b>Prostate cancer<sup>a</sup></b>   |              |                       |             |                  |                       |             |                  |   |                       |             |                  |
|                                      | No insurance | 110                   | 0.95        | 0.78-1.16        | 122                   | 1.23        | 0.93-1.63        |   | 69                    | 1.29        | 0.96-1.74        |
|                                      | Private only | 2,417                 | 1.00        |                  | 2,126                 | 1.00        |                  |   | 1,213                 | 1.00        |                  |
|                                      | Medicare     | 2,662                 | <b>0.87</b> | <b>0.80-0.95</b> | 2,368                 | 0.94        | 0.88-1.01        | * | 1,656                 | 1.01        | 0.92-1.10        |
|                                      | Other public | 907                   | 1.04        | 0.92-1.18        | 1,270                 | <b>1.10</b> | <b>1.01-1.20</b> |   | 926                   | <b>1.19</b> | <b>1.06-1.34</b> |
| <b>Lung cancer<sup>b</sup></b>       |              |                       |             |                  |                       |             |                  |   |                       |             |                  |
|                                      | No insurance | 867                   | <b>1.11</b> | <b>1.01-1.23</b> | 749                   | 1.11        | 0.96-1.28        |   | 500                   | <b>1.17</b> | <b>1.06-1.29</b> |
|                                      | Private only | 13,275                | 1.00        |                  | 10,838                | 1.00        |                  |   | 7,329                 | 1.00        |                  |
|                                      | Medicare     | 11,647                | 0.99        | 0.96-1.02        | 9,588                 | 1.01        | 0.98-1.05        |   | 8,092                 | 1.01        | 0.97-1.06        |
|                                      | Other public | 5,062                 | 0.99        | 0.95-1.04        | 7,355                 | 1.02        | 0.97-1.07        |   | 6,183                 | 0.98        | 0.94-1.03        |
| <b>Colorectal cancer<sup>c</sup></b> |              |                       |             |                  |                       |             |                  |   |                       |             |                  |
|                                      | No insurance | 311                   | <b>1.19</b> | <b>1.04-1.35</b> | 312                   | <b>1.32</b> | <b>1.10-1.57</b> |   | 226                   | <b>1.30</b> | <b>1.12-1.53</b> |
|                                      | Private only | 4,926                 | 1.00        |                  | 4,321                 | 1.00        |                  |   | 2,728                 | 1.00        |                  |
|                                      | Medicare     | 3,753                 | 1.01        | 0.96-1.06        | 3,117                 | 1.05        | 0.99-1.11        | * | 2,275                 | <b>1.08</b> | <b>1.01-1.16</b> |
|                                      | Other public | 1,496                 | <b>1.12</b> | <b>1.04-1.21</b> | 2,372                 | <b>1.13</b> | <b>1.05-1.21</b> |   | 2,135                 | <b>1.17</b> | <b>1.10-1.25</b> |
| <b>Melanoma<sup>d</sup></b>          |              |                       |             |                  |                       |             |                  |   |                       |             |                  |
|                                      | No insurance | 71                    | <b>1.92</b> | <b>1.50-2.47</b> | 64                    | <b>1.68</b> | <b>1.23-2.30</b> |   | 37                    | <b>1.89</b> | <b>1.34-2.65</b> |
|                                      | Private only | 857                   | 1.00        |                  | 926                   | 1.00        |                  |   | 571                   | 1.00        |                  |
|                                      | Medicare     | 455                   | 1.09        | 0.95-1.25        | 525                   | 1.06        | 0.93-1.21        |   | 399                   | 1.10        | 0.94-1.29        |
|                                      | Other public | 207                   | <b>1.55</b> | <b>1.21-1.98</b> | 335                   | <b>1.29</b> | <b>1.05-1.59</b> |   | 259                   | <b>1.36</b> | <b>1.16-1.60</b> |
| <b>Women</b>                         |              |                       |             |                  |                       |             |                  |   |                       |             |                  |
| <b>Breast cancer<sup>e</sup></b>     |              |                       |             |                  |                       |             |                  |   |                       |             |                  |
|                                      | No insurance | 295                   | <b>1.45</b> | <b>1.26-1.67</b> | 246                   | <b>1.61</b> | <b>1.37-1.89</b> |   | 169                   | <b>1.72</b> | <b>1.45-2.03</b> |
|                                      | Private only | 6,005                 | 1.00        |                  | 5,112                 | 1.00        |                  |   | 2,802                 | 1.00        |                  |
|                                      | Medicare     | 2,978                 | 1.02        | 0.96-1.09        | 2,516                 | 1.07        | 0.99-1.15        |   | 1,788                 | 1.07        | 0.98-1.17        |
|                                      | Other public | 1,760                 | <b>1.21</b> | <b>1.14-1.31</b> | 2,803                 | <b>1.32</b> | <b>1.24-1.40</b> |   | 2,085                 | <b>1.25</b> | <b>1.17-1.34</b> |

|                                      |              |        |             |                  |       |             |                  |       |             |                  |   |
|--------------------------------------|--------------|--------|-------------|------------------|-------|-------------|------------------|-------|-------------|------------------|---|
| <b>Lung cancer<sup>b</sup></b>       |              |        |             |                  |       |             |                  |       |             |                  |   |
|                                      | No insurance | 411    | 1.08        | 0.97-1.21        | 447   | 1.05        | 0.89-1.23        | 345   | <b>1.28</b> | <b>1.12-1.46</b> | * |
|                                      | Private only | 11,165 | 1.00        |                  | 9,909 | 1.00        |                  | 6,761 | 1.00        |                  |   |
|                                      | Medicare     | 10,475 | 1.00        | 0.96-1.03        | 9,390 | <b>0.95</b> | <b>0.92-0.98</b> | 7,862 | 1.00        | 0.96-1.04        |   |
|                                      | Other public | 2,798  | 0.99        | 0.94-1.03        | 5,119 | 0.99        | 0.95-1.04        | 4,217 | 1.01        | 0.96-1.06        |   |
| <b>Colorectal cancer<sup>c</sup></b> |              |        |             |                  |       |             |                  |       |             |                  |   |
|                                      | No insurance | 168    | 1.16        | 0.96-1.41        | 190   | 1.17        | 0.97-1.41        | 140   | <b>1.33</b> | <b>1.08-1.64</b> |   |
|                                      | Private only | 4,412  | 1.00        |                  | 4,102 | 1.00        |                  | 2,509 | 1.00        |                  |   |
|                                      | Medicare     | 4,412  | 1.01        | 0.96-1.06        | 3,393 | 1.00        | 0.94-1.06        | 2,509 | <b>1.08</b> | <b>1.01-1.15</b> | * |
|                                      | Other public | 1,097  | 0.99        | 0.91-1.07        | 2,165 | <b>1.09</b> | <b>1.03-1.16</b> | 1,770 | <b>1.13</b> | <b>1.05-1.22</b> | * |
| <b>Melanoma<sup>d</sup></b>          |              |        |             |                  |       |             |                  |       |             |                  |   |
|                                      | No insurance | 20     | 1.08        | 0.63-1.85        | 23    | 1.14        | 0.74-1.74        | 17    | 1.71        | 0.95-3.10        |   |
|                                      | Private only | 383    | 1.00        |                  | 418   | 1.00        |                  | 237   | 1.00        |                  |   |
|                                      | Medicare     | 223    | 0.98        | 0.80-1.19        | 242   | 0.97        | 0.77-1.21        | 195   | 1.26        | 0.98-1.61        |   |
|                                      | Other public | 96     | <b>1.64</b> | <b>1.27-2.12</b> | 166   | <b>1.32</b> | <b>1.04-1.66</b> | 111   | <b>1.73</b> | <b>1.36-2.20</b> |   |

**eTable 5.** Five-year all-cause mortality by health insurance status (reference: Private only) in each calendar period of diagnosis, by cancer site and sex: California, 1997-2014

|                                      | 1997 - 2002      |             |                  | 2003 - 2008      |             |                  |   | 2009-2014        |             |                  |   |
|--------------------------------------|------------------|-------------|------------------|------------------|-------------|------------------|---|------------------|-------------|------------------|---|
| <b>Men</b>                           | All-cause deaths | HR          | 95% CI           | All-cause deaths | HR          | 95% CI           |   | All-cause deaths | HR          | 95% CI           |   |
| <b>Prostate cancer<sup>a</sup></b>   |                  |             |                  |                  |             |                  |   |                  |             |                  |   |
| No insurance                         | 242              | <b>0.87</b> | <b>0.77-0.99</b> | 235              | 1.11        | 0.93-1.33        | * | 122              | <b>1.24</b> | <b>1.05-1.46</b> | * |
| Private only                         | 7,164            | 1.00        |                  | 5,815            | 1.00        |                  |   | 2,737            | 1.00        |                  |   |
| Medicare                             | 9,382            | 0.97        | 0.92-1.03        | 7,318            | 1.02        | 0.97-1.07        |   | 3,757            | <b>1.09</b> | <b>1.02-1.17</b> | * |
| Other public                         | 2,418            | 1.01        | 0.94-1.08        | 3,515            | <b>1.20</b> | <b>1.12-1.28</b> | * | 1,990            | <b>1.29</b> | <b>1.19-1.39</b> | * |
| <b>Lung cancer<sup>b</sup></b>       |                  |             |                  |                  |             |                  |   |                  |             |                  |   |
| No insurance                         | 1,019            | <b>1.13</b> | <b>1.03-1.24</b> | 904              | 1.16        | 1.00-1.35        |   | 586              | <b>1.17</b> | <b>1.06-1.29</b> |   |
| Private only                         | 15,321           | 1.00        |                  | 12,496           | 1.00        |                  |   | 8,468            | 1.00        |                  |   |
| Medicare                             | 14,181           | 1.02        | 0.99-1.05        | 11,564           | 1.03        | 1.00-1.07        |   | 9,897            | 1.04        | 1.00-1.08        |   |
| Other public                         | 6,053            | 1.02        | 0.97-1.06        | 9,003            | <b>1.06</b> | <b>1.02-1.11</b> |   | 7,630            | 1.03        | 0.99-1.07        |   |
| <b>Colorectal cancer<sup>c</sup></b> |                  |             |                  |                  |             |                  |   |                  |             |                  |   |
| No insurance                         | 392              | <b>1.17</b> | <b>1.04-1.32</b> | 402              | <b>1.31</b> | <b>1.13-1.52</b> |   | 301              | <b>1.36</b> | <b>1.18-1.57</b> |   |
| Private only                         | 6,995            | 1.00        |                  | 5,984            | 1.00        |                  |   | 3,701            | 1.00        |                  |   |
| Medicare                             | 6,599            | <b>1.07</b> | <b>1.02-1.11</b> | 5,255            | <b>1.09</b> | <b>1.04-1.14</b> |   | 3,564            | <b>1.08</b> | <b>1.02-1.15</b> |   |
| Other public                         | 2,200            | <b>1.14</b> | <b>1.08-1.22</b> | 3,587            | <b>1.18</b> | <b>1.11-1.25</b> |   | 3,008            | <b>1.19</b> | <b>1.12-1.26</b> |   |
| <b>Melanoma<sup>d</sup></b>          |                  |             |                  |                  |             |                  |   |                  |             |                  |   |
| No insurance                         | 100              | <b>1.84</b> | <b>1.45-2.32</b> | 101              | <b>1.66</b> | <b>1.27-2.17</b> |   | 60               | <b>1.94</b> | <b>1.47-2.55</b> |   |
| Private only                         | 1,556            | 1.00        |                  | 1,614            | 1.00        |                  |   | 956              | 1.00        |                  |   |
| Medicare                             | 1,097            | 1.02        | 0.93-1.12        | 1,358            | 1.08        | 0.98-1.19        |   | 945              | 1.09        | 0.97-1.22        |   |
| Other public                         | 355              | <b>1.61</b> | <b>1.33-1.96</b> | 583              | <b>1.32</b> | <b>1.16-1.52</b> |   | 445              | <b>1.47</b> | <b>1.24-1.74</b> |   |
| <b>Women</b>                         |                  |             |                  |                  |             |                  |   |                  |             |                  |   |
| <b>Breast cancer<sup>e</sup></b>     |                  |             |                  |                  |             |                  |   |                  |             |                  |   |
| No insurance                         | 393              | <b>1.48</b> | <b>1.33-1.65</b> | 300              | <b>1.59</b> | <b>1.38-1.83</b> |   | 201              | <b>1.63</b> | <b>1.40-1.91</b> |   |
| Private only                         | 9,319            | 1.00        |                  | 7,664            | 1.00        |                  |   | 4,024            | 1.00        |                  |   |
| Medicare                             | 7,505            | <b>1.08</b> | <b>1.03-1.13</b> | 5,698            | <b>1.09</b> | <b>1.04-1.15</b> |   | 3,595            | <b>1.14</b> | <b>1.07-1.23</b> |   |
| Other public                         | 2,606            | <b>1.27</b> | <b>1.20-1.35</b> | 4,367            | <b>1.36</b> | <b>1.29-1.44</b> | * | 3,050            | <b>1.34</b> | <b>1.26-1.43</b> |   |
| <b>Lung cancer<sup>b</sup></b>       |                  |             |                  |                  |             |                  |   |                  |             |                  |   |

|                                      |              |        |             |                  |        |             |                  |   |       |             |                  |   |
|--------------------------------------|--------------|--------|-------------|------------------|--------|-------------|------------------|---|-------|-------------|------------------|---|
|                                      | No insurance | 476    | 1.09        | 0.98-1.21        | 529    | 1.08        | 0.90-1.30        |   | 415   | <b>1.34</b> | <b>1.18-1.52</b> | * |
|                                      | Private only | 12,872 | 1.00        |                  | 11,363 | 1.00        |                  |   | 7,815 | 1.00        |                  |   |
|                                      | Medicare     | 12,721 | 1.02        | 0.99-1.05        | 11,239 | 0.98        | 0.95-1.01        | * | 9,444 | 1.01        | 0.97-1.05        |   |
|                                      | Other public | 3,373  | 1.03        | 0.98-1.07        | 6,295  | <b>1.05</b> | <b>1.01-1.10</b> |   | 5,181 | <b>1.05</b> | <b>1.01-1.10</b> |   |
| <b>Colorectal cancer<sup>c</sup></b> |              |        |             |                  |        |             |                  |   |       |             |                  |   |
|                                      | No insurance | 210    | 1.09        | 0.92-1.29        | 232    | 1.07        | 0.87-1.32        |   | 171   | <b>1.29</b> | <b>1.07-1.55</b> |   |
|                                      | Private only | 6,177  | 1.00        |                  | 5,584  | 1.00        |                  |   | 3,277 | 1.00        |                  |   |
|                                      | Medicare     | 7,400  | <b>1.05</b> | <b>1.01-1.09</b> | 5,497  | 1.02        | 0.97-1.07        |   | 3,805 | <b>1.10</b> | <b>1.05-1.16</b> |   |
|                                      | Other public | 1,666  | 1.06        | 1.00-1.13        | 3,343  | <b>1.18</b> | <b>1.12-1.25</b> | * | 2,522 | <b>1.21</b> | <b>1.14-1.29</b> | * |
| <b>Melanoma<sup>d</sup></b>          |              |        |             |                  |        |             |                  |   |       |             |                  |   |
|                                      | No insurance | 29     | 0.90        | 0.61-1.35        | 31     | 0.98        | 0.63-1.54        |   | 25    | <b>2.24</b> | <b>1.36-3.72</b> |   |
|                                      | Private only | 687    | 1.00        |                  | 752    | 1.00        |                  |   | 403   | 1.00        |                  |   |
|                                      | Medicare     | 596    | 1.14        | 0.97-1.34        | 645    | 0.97        | 0.85-1.10        |   | 430   | <b>1.22</b> | <b>1.02-1.45</b> |   |
|                                      | Other public | 154    | <b>1.67</b> | <b>1.34-2.08</b> | 291    | <b>1.30</b> | <b>1.10-1.55</b> |   | 196   | <b>1.93</b> | <b>1.60-2.32</b> |   |

Footnotes to eTables 4 and 5.

<sup>a</sup> Prostate cancer: adjusted for race, lymph node involvement, grade, surgery, radiation, chemotherapy, marital status, nSES, NCI-designated cancer center, patient racial distribution of reporting hospital, patient SES distribution of reporting hospital, patient insurance distribution of reporting hospital, year of diagnosis, and clustering by hospital.

<sup>b</sup> Lung cancer: adjusted for race, lymph node involvement, histology, surgery, radiation, chemotherapy, marital status, nSES, neighborhood racial composition, urban/rural (men only), NCI-designated cancer center, patient racial distribution of reporting hospital (women only), patient SES distribution of reporting hospital, patient insurance distribution of reporting hospital (men only), year of diagnosis, and clustering by hospital.

<sup>c</sup> Colorectal cancer: adjusted for race, tumor size, lymph node involvement, grade, anatomical subsite, surgery, radiation, chemotherapy, marital status, nSES, neighborhood racial composition, urban/rural, NCI-designated cancer center, patient SES distribution of reporting hospital, year of diagnosis, and clustering by hospital.

<sup>d</sup> Melanoma: adjusted for race, thickness, lymph node involvement, surgery, radiation, chemotherapy, marital status, nSES, NCI-designated cancer center (men only), neighborhood racial composition, patient SES distribution of reporting hospital (women only), patient insurance distribution of reporting hospital, year of diagnosis, and clustering by hospital.

<sup>e</sup> Breast cancer: adjusted for race, tumor size, grade, surgery, radiation, chemotherapy, ER/PR status, marital status, nSES, neighborhood racial composition, urban/rural, NCI-designated cancer center, patient racial distribution of reporting hospital, patient SES distribution of reporting hospital, year of diagnosis, and clustering by hospital.

\* Indicates Wald p-value for individual cross-product interaction terms between health insurance category and time-period (reference: 1997-2002) was  $p < 0.05$  in an overall model.

Figures in **bold** indicate that the HR is statistically significantly different to the reference group (private insurance) in a given calendar period ( $p < 0.05$ ).

Models were stratified by age at diagnosis (single year of age) and stage at diagnosis (localized, regional, distant)

**eFigure A-D.** Five-year cancer-specific survival at age 65 by insurance status and calendar period, for A) lung cancer (men), B) colorectal cancer (men), C) melanoma (men) and D) melanoma (women).

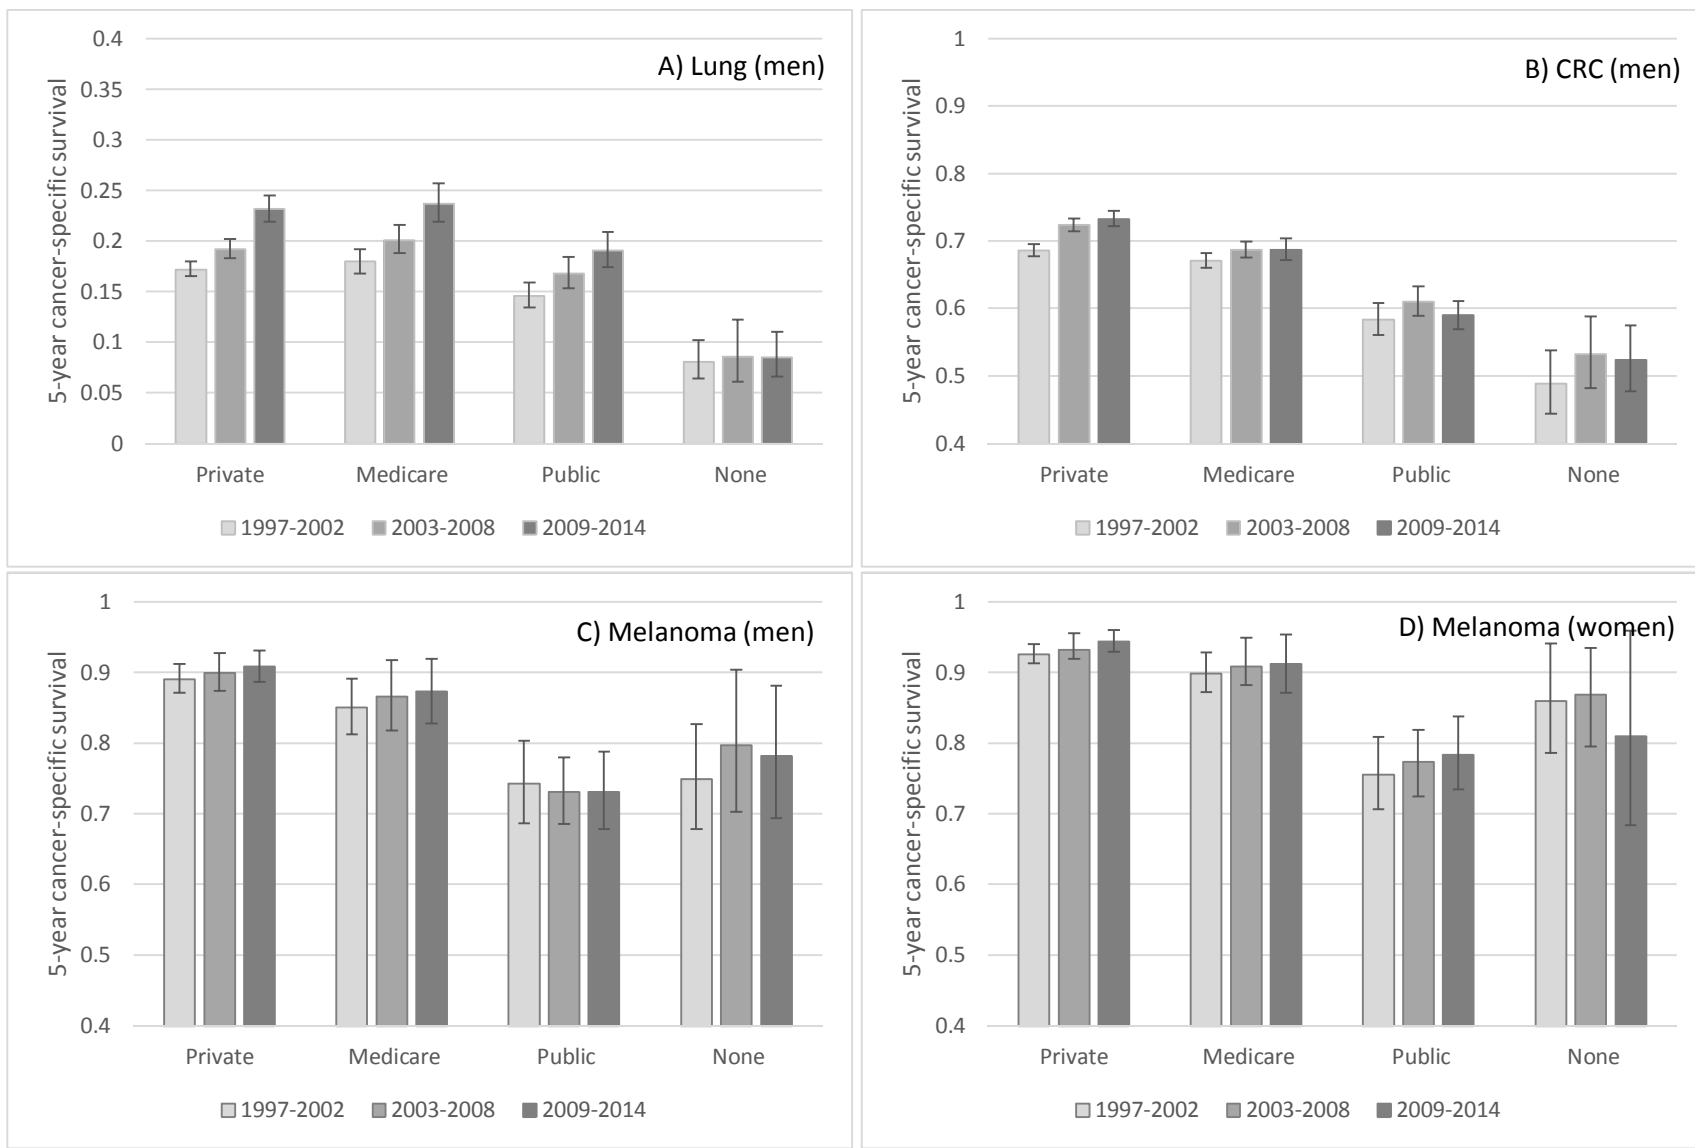

Supplement: jamaoncol-4-317-s001.pdf [file jamaoncol-4-317-s001.pdf]
